# Supplementary material for: Epidemiological profile of patients with rifampicin-resistant tuberculosis: an analysis of the Uganda National Tuberculosis Reference Laboratory Surveillance Data, 2014–2018
Source: PubMed Central journal article supplement (PMC8106164; doi:10.1186/s13756-021-00947-2), 2021-05-08
Supplement: 13756_2021_947_MOESM1_ESM.pdf [file 13756_2021_947_MOESM1_ESM.pdf]

**Additional file 1**

**Supplementary Table S1: Districts with highest RR TB incidence rates per 100,000 population, Uganda, 2014-2018**

| Year | District with highest IR | IR/100,000 |
|------|--------------------------|------------|
| 2014 | Kitgum                   | 6.4        |
|      | Lira                     | 3.4        |
|      | Otuke                    | 2.9        |
| 2015 | Lira                     | 7.4        |
|      | Kitgum                   | 4.8        |
|      | Gulu                     | 4.3        |
|      | Kampala                  | 4.2        |
| 2016 | Nakapiripirit            | 6.3        |
|      | Apac                     | 5.5        |
|      | Kitgum                   | 5.2        |
| 2017 | Nakapiripirit            | 11         |
|      | Gulu                     | 4.7        |
|      | Kitgum                   | 4.2        |
|      | Napak                    | 4          |
| 2018 | Nakapiripirit            | 5.8        |
|      | Hoima                    | 4.3        |
|      | Lira                     | 3.9        |
|      | Napak                    | 3.9        |

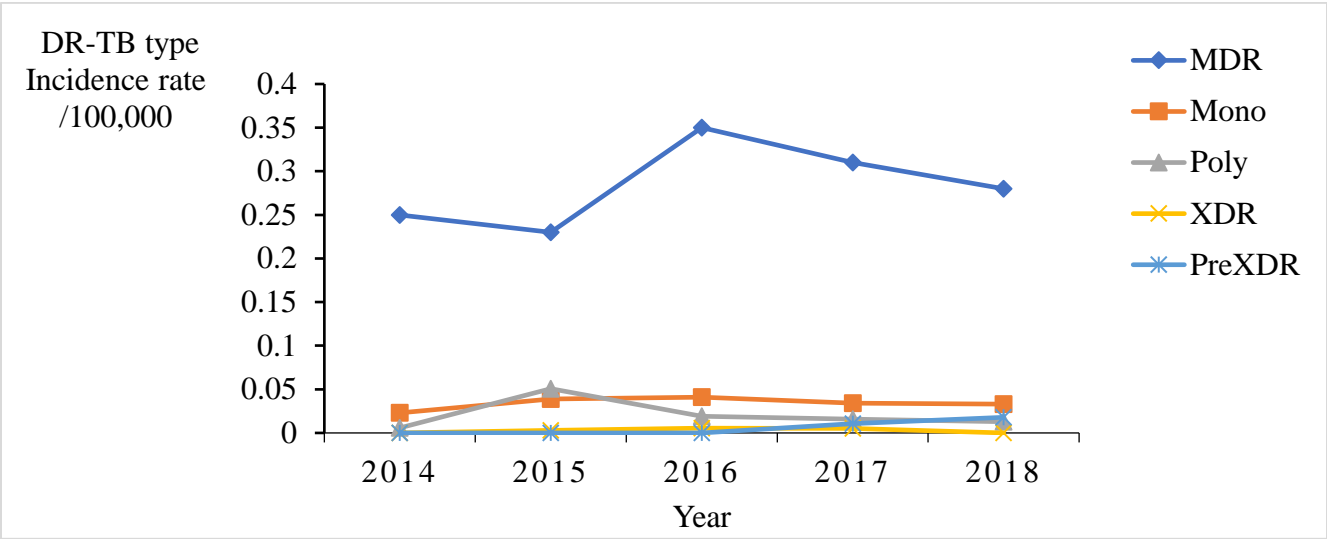

**Supplementary Figure S1:** Trends of anti-tuberculosis drug resistance types among patients with rifampicin resistant tuberculosis, Uganda 2014-2018

**Supplementary Table S2: Odds ratios for changes in incidence by drug resistance types among RR-TB patients in Uganda 2014-2018**

| Drug Resistance Type  | OR   | 95% CI    |
|-----------------------|------|-----------|
| Mono resistance       | 1.04 | 0.89-1.2  |
| Poly resistance       | 0.92 | 0.78-1.09 |
| Multi drug resistance | 1.05 | 0.99-1.1  |
| Pre-XDR               | 1.36 | 1.09-1.7* |
| XDR                   | 1.01 | 0.82-1.2  |

\*Statistically significant at p=0.05
